# Supplementary material
Source: publisher site journal article supplement (https://www.dovepress.com/article/459954)
Supplement: Supplementary file 1 [file get_supplementary_file.php]

**Supplementary materials**


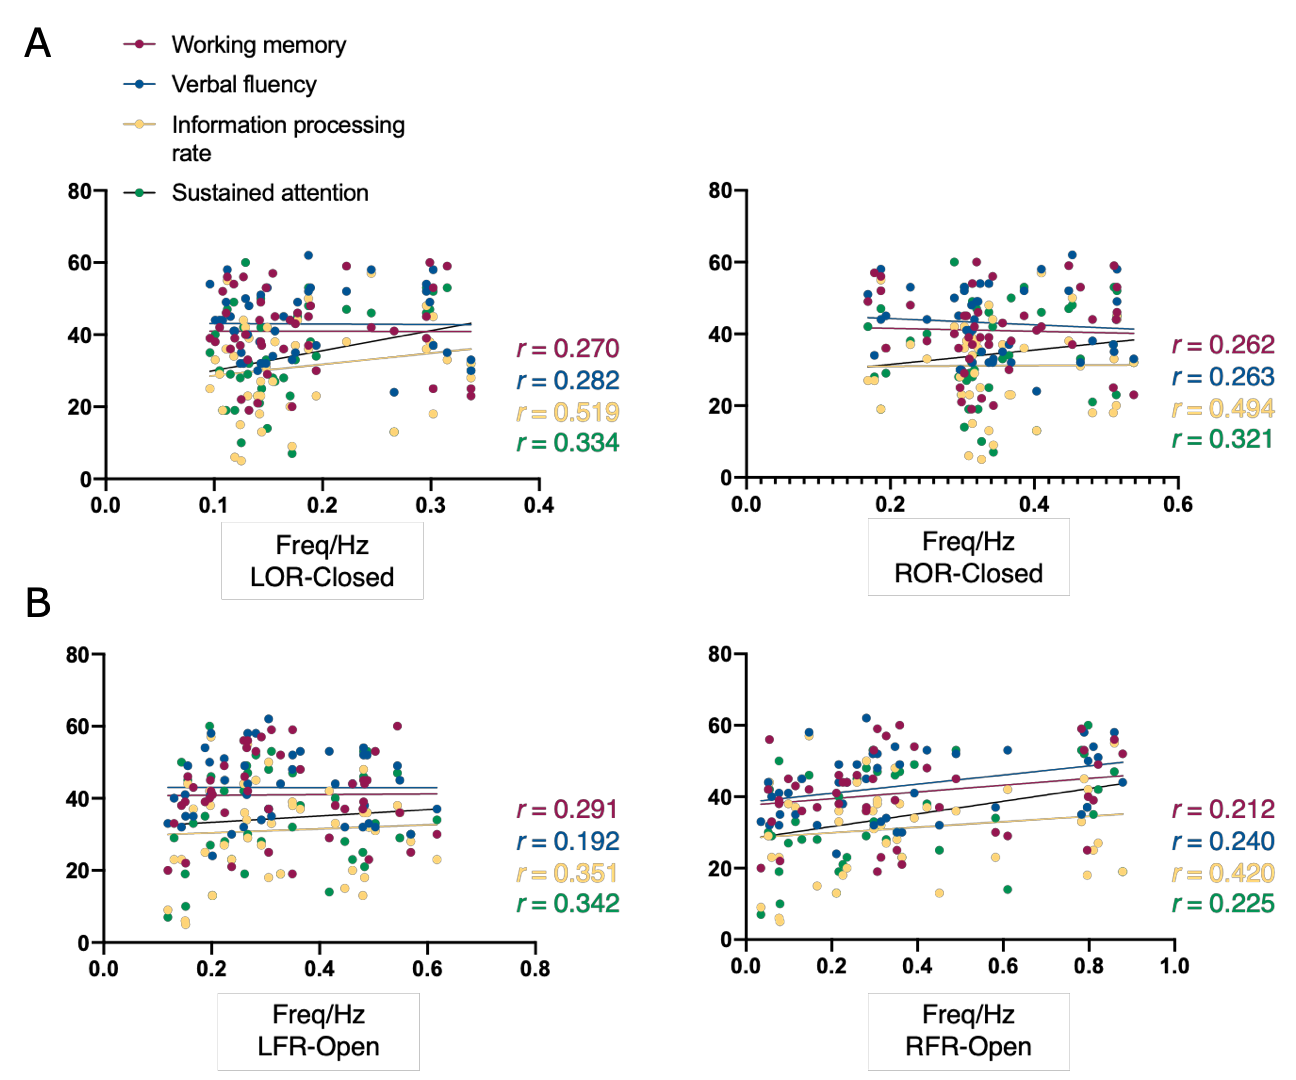


Figure S1. The linear correlation between cognitive constructs and alpha power.

A. The linear correlation between cognitive constructs and alpha power in the occipital area with closed-eyes state. The red represents working memory, the blue represents verbal fluency, the yellow represents information processing, while the green represents sustained attention.

B. The linear correlation between cognitive constructs and alpha power in the frontal area with open-eyes state. The red represents working memory, the blue represents verbal fluency, the yellow represents information processing, while the green represents sustained attention.
